# Supplementary material
Source: publisher site journal article supplement (https://www.dovepress.com/get_supplementary_file.php?f=259009.docx)
Supplement: Supplementary file 1 [file get_supplementary_file.php]

**Supplement**

| 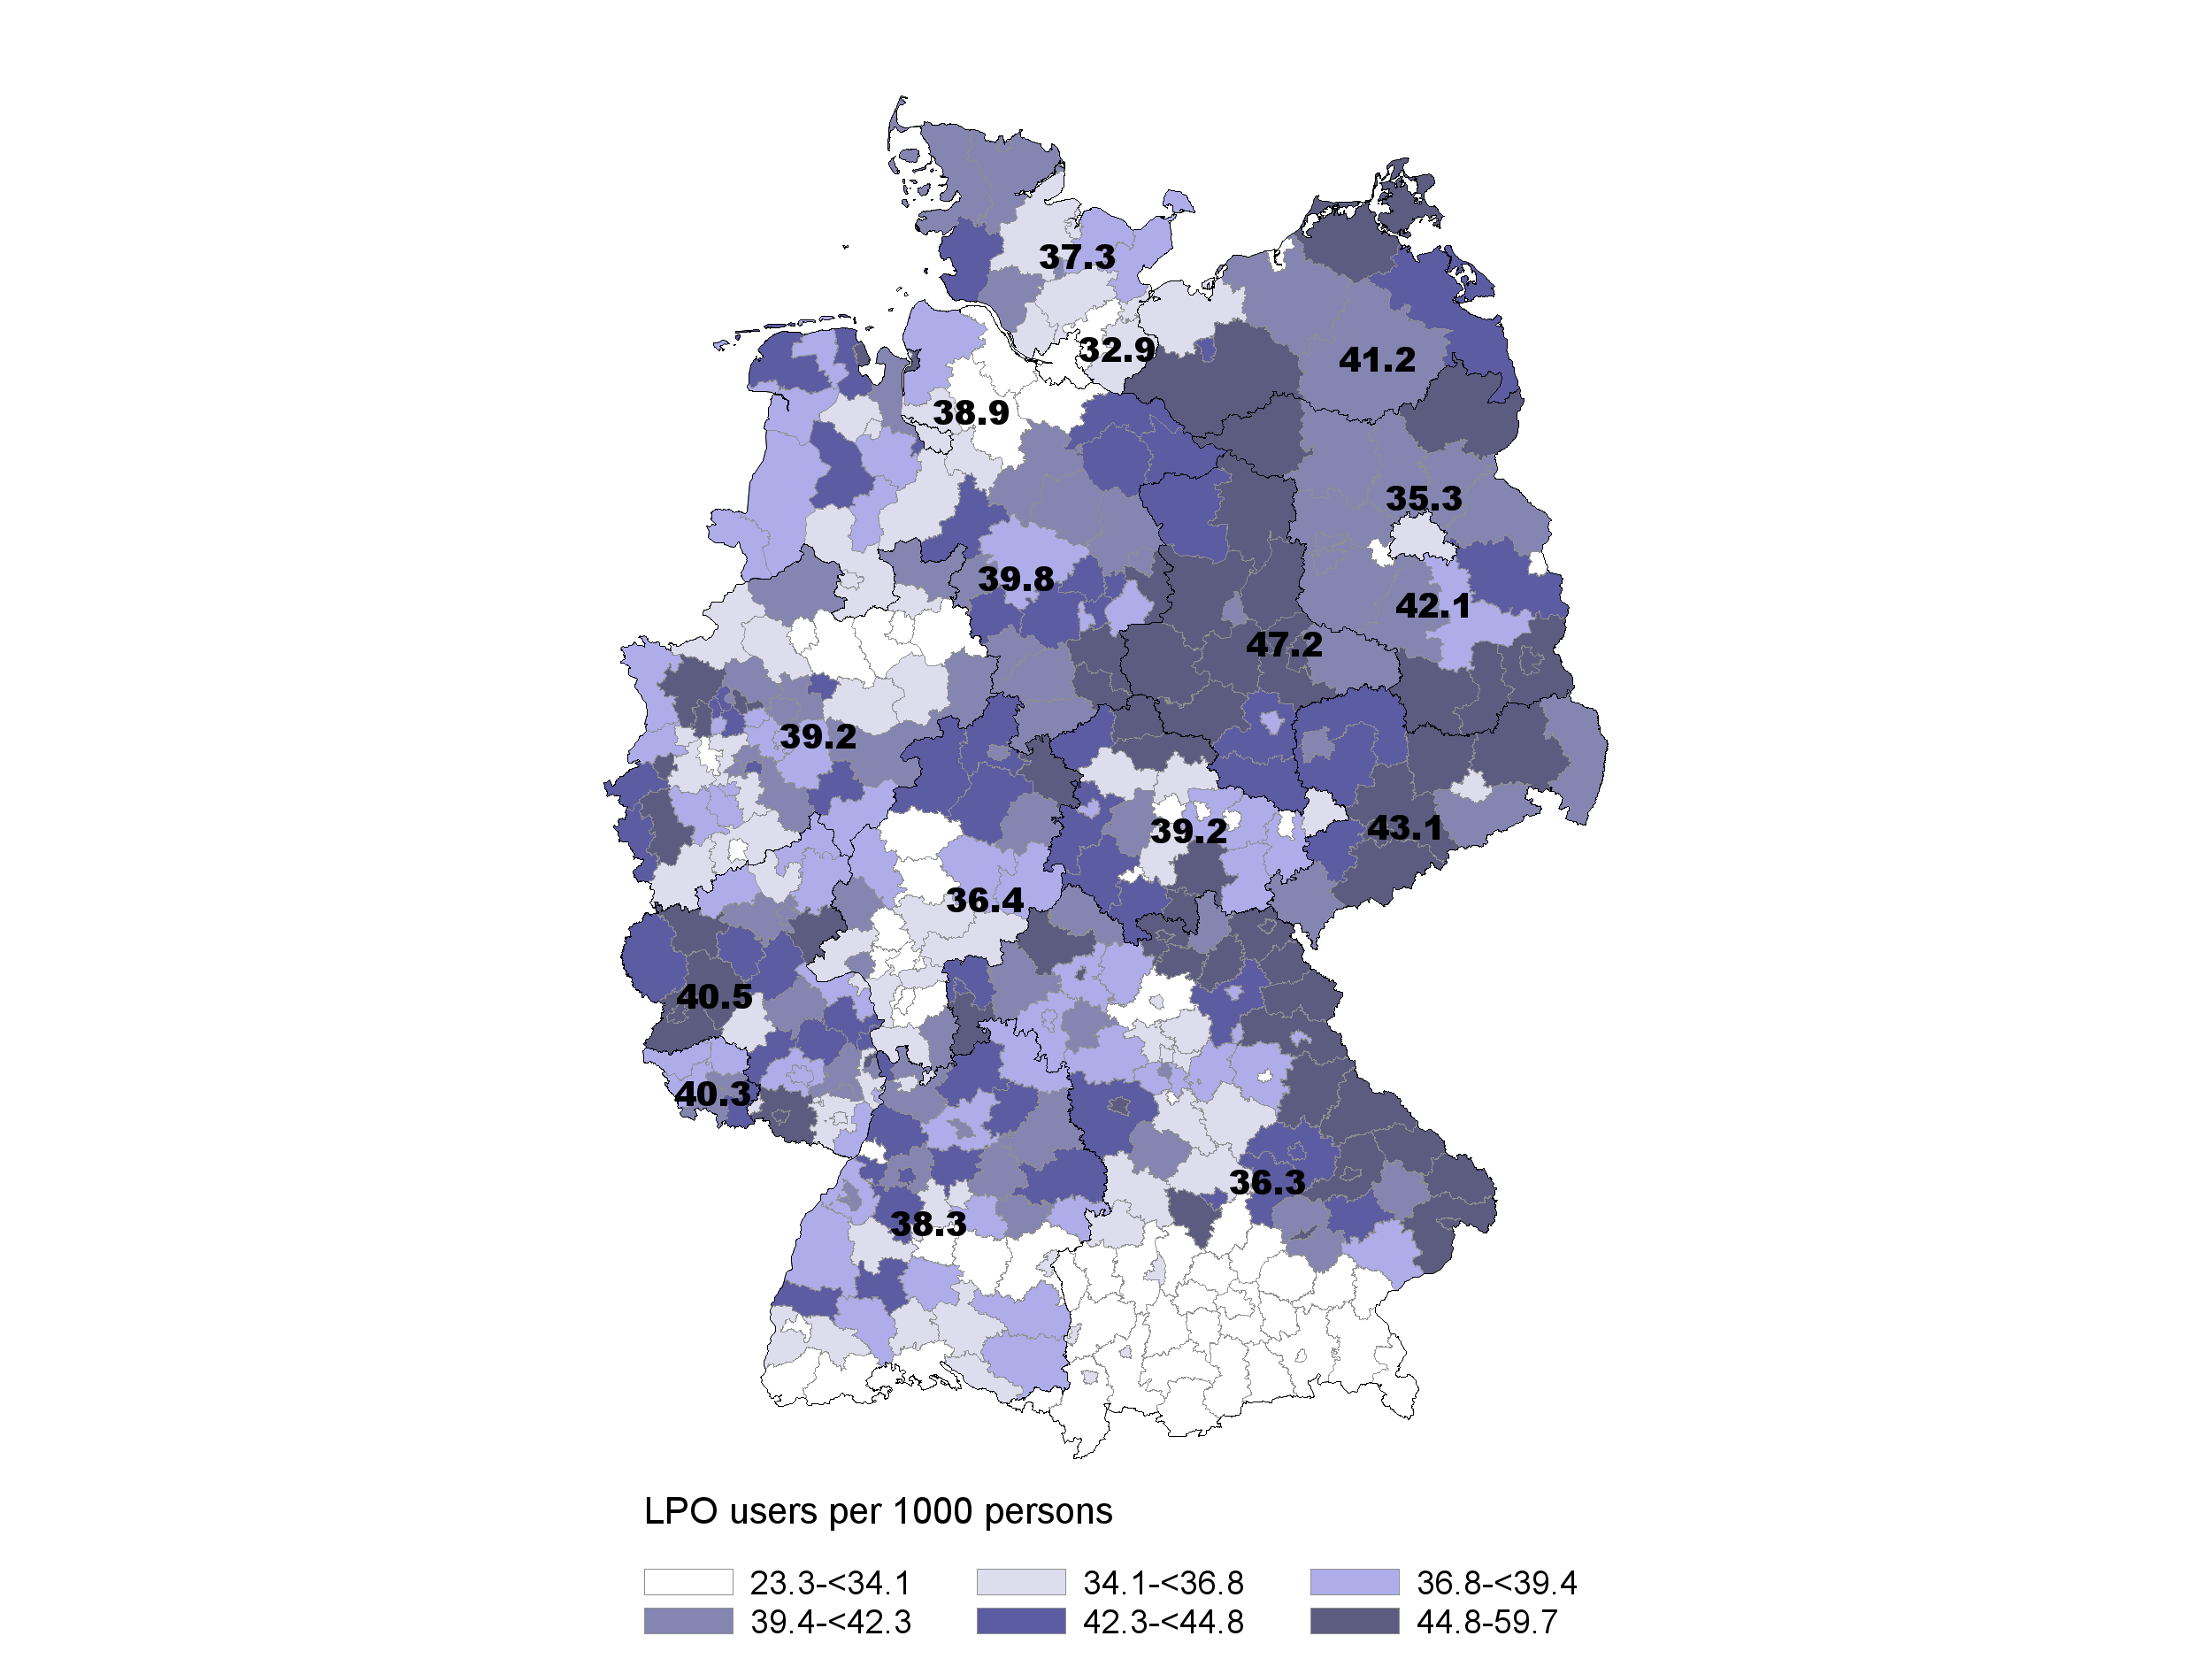 | 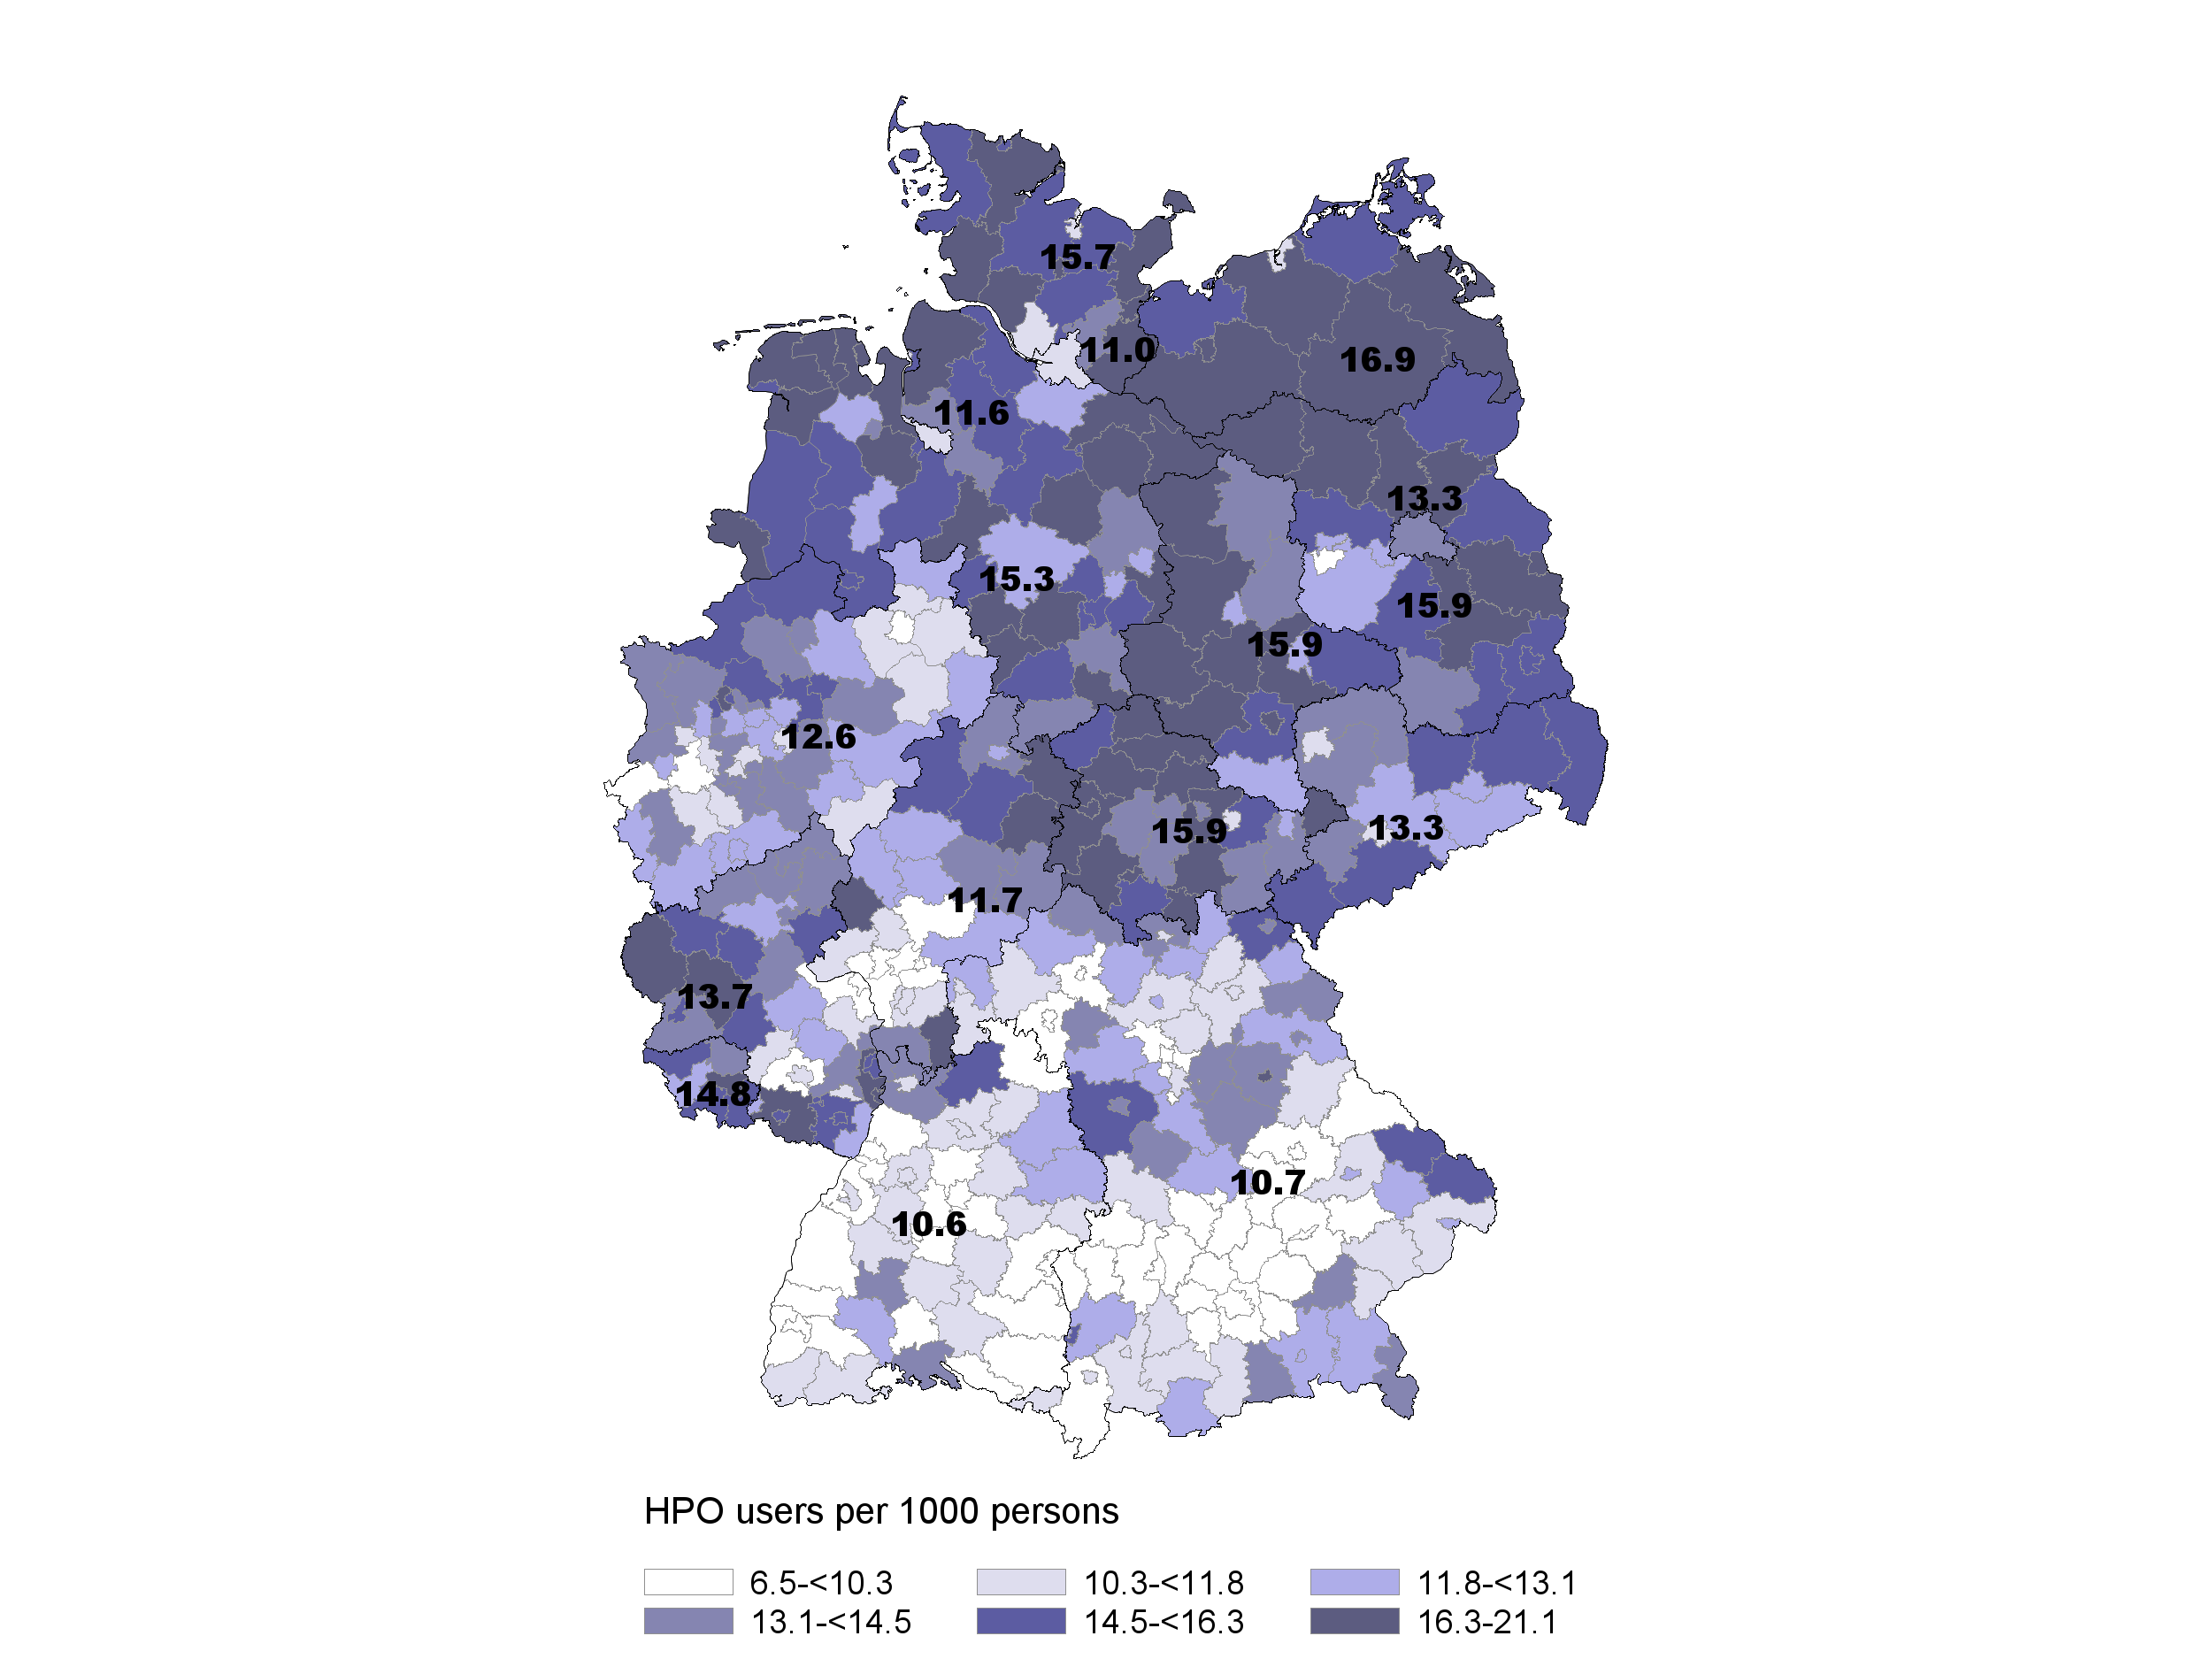 |
| --- | --- |

Supplemental Figure 1: LPO and HPO users per 1000 persons

HPO: high-potency opioid, LPO: low-potency opioid

**
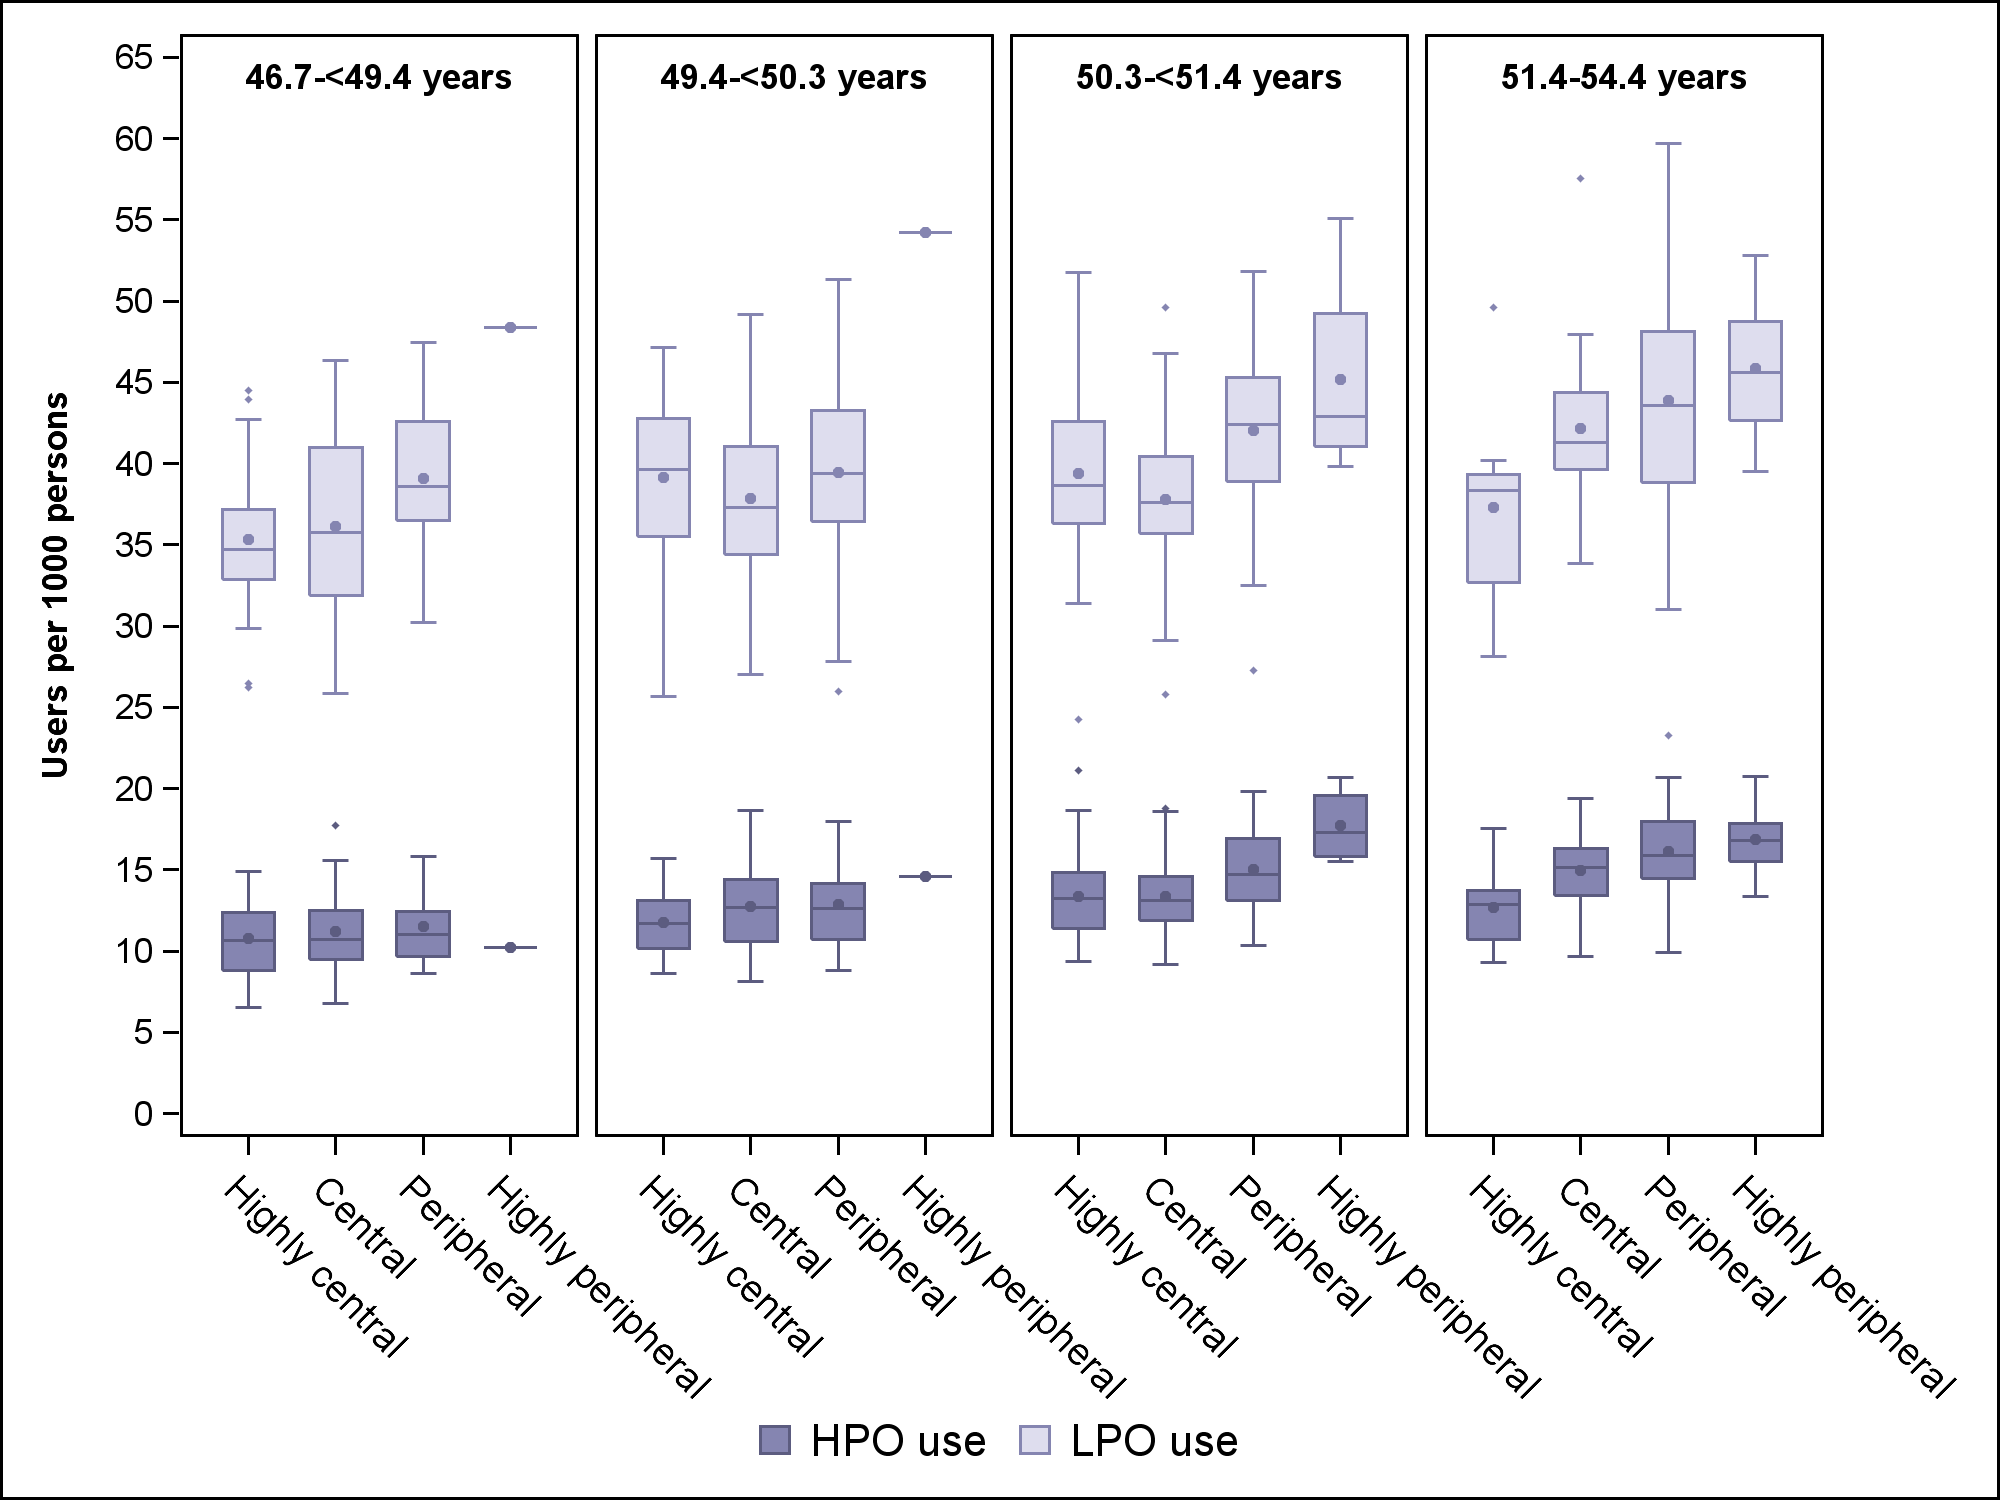

Supplemental Figure 2: LPO and HPO users per 1000 persons by districts’ mean age (categorized in quartiles) and region**

HPO: high-potency opioid, LPO: low-potency opioid

| 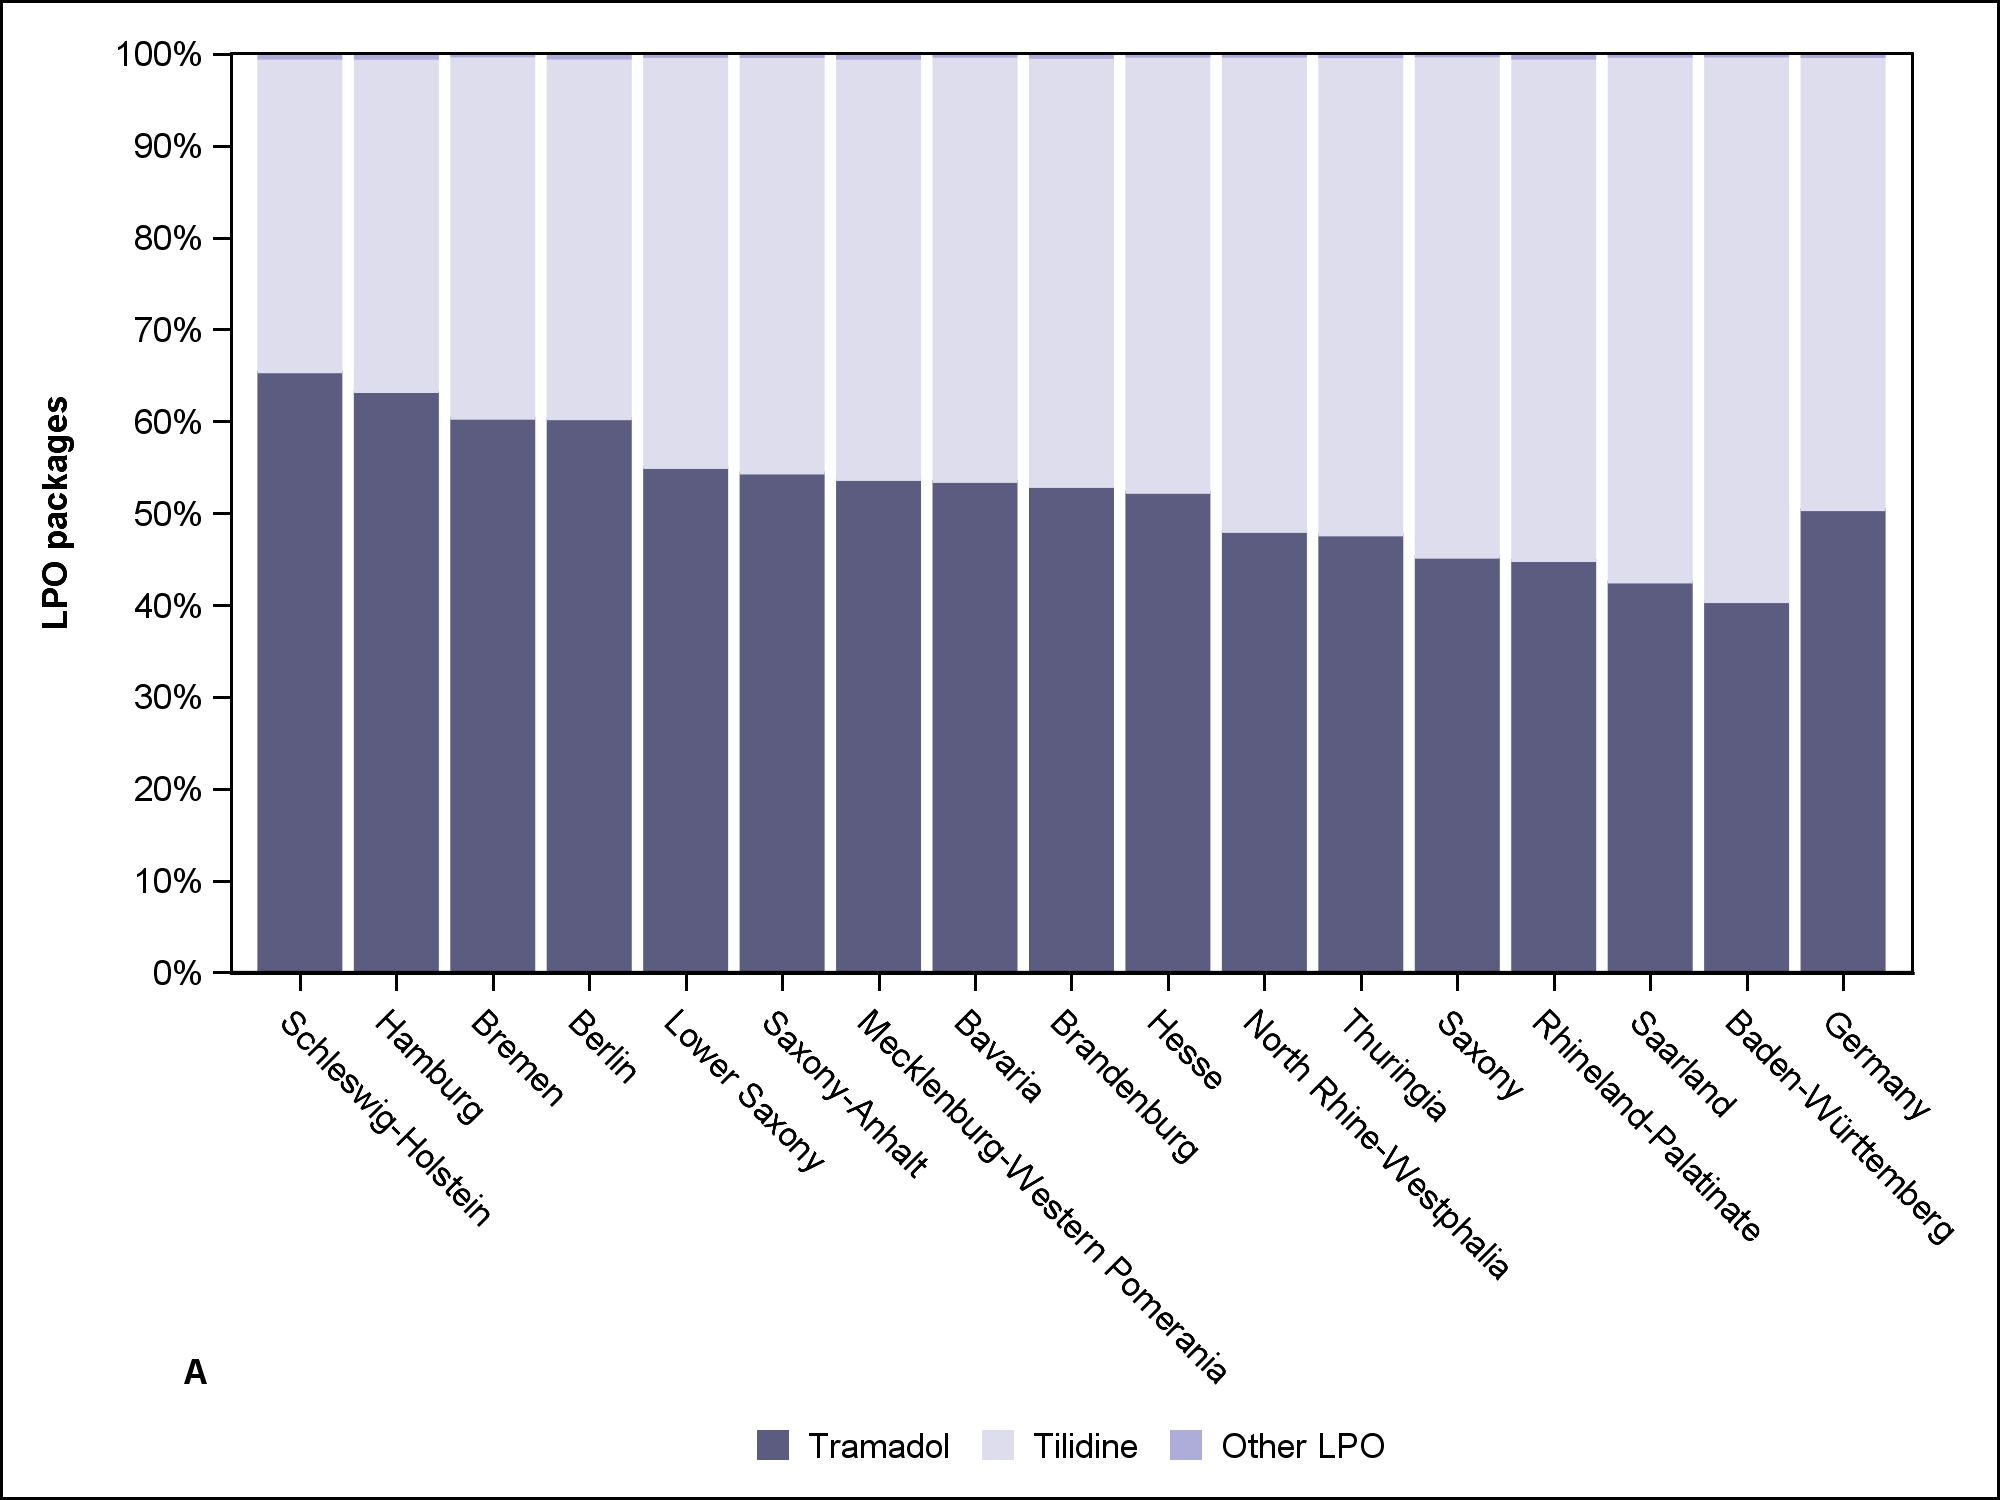 |
| --- |
| 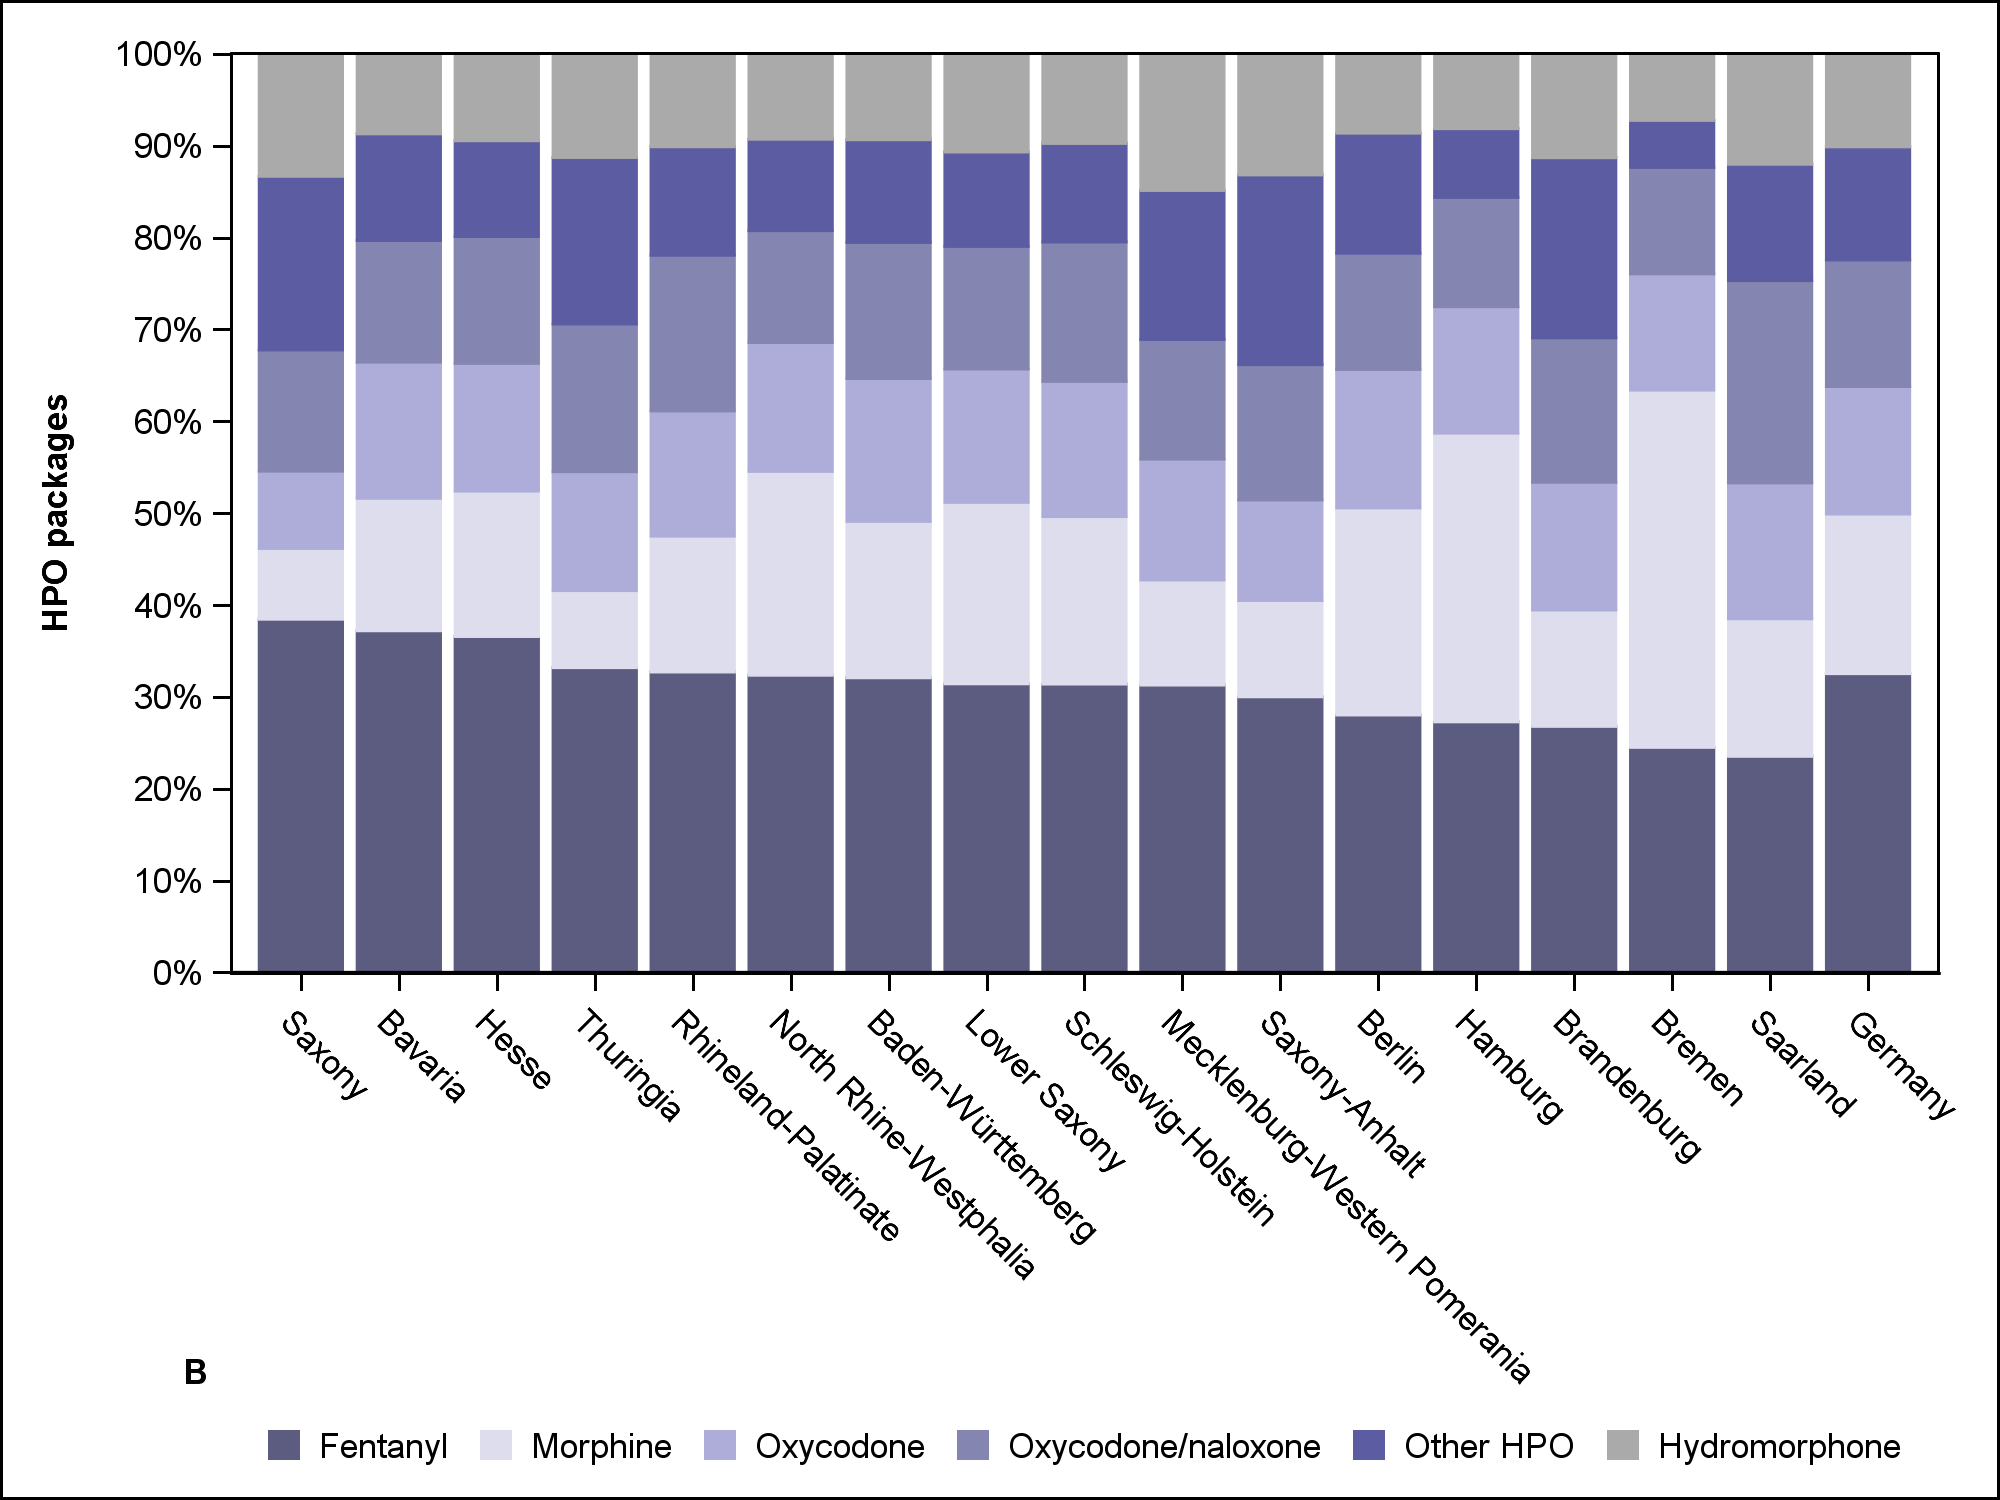 |

**Supplemental Figure 3: LPO (A) and HPO (B) packages by federal state**

HPO: high-potency opioid, LPO: low-potency opioid
